# Supplementary material for: Polyvalent DNA–graphenenanosheets “click” conjugates
Source: Royal Society of Chemistry journal article supplement (doi:10.1039/c1nr11174d), 2011-11-17

# Supporting information

## Polyvalent DNA-graphene nanosheets “click” conjugates

Zihao Wang, Zhilei Ge, Xiaoxue Zheng, Huang Zhang, Cheng Peng\*, Chunhai Fan, Qing Huang\*

Laboratory of Physical Biology, Shanghai Institute of Applied Physics, Chinese Academy of Sciences, Shanghai 201800, China

**SI Tab.1** Sequences of oligonucleotides employed in this work

| oligonucleotide        | Sequences(5'-3')                                                                      |
|------------------------|---------------------------------------------------------------------------------------|
| TSP-A                  | ACATTCCTAAGTCTGAAACATTACAGCTTGCTACACGAGAAGAGC<br>CGCCATAGTATTTTTTTTTTTGTATCCAGTGGCTCA |
| TSP-B                  | SH-TATCACCAGGCAGTTGACAGTGTAGCAAGCTGTAATAGATGCG<br>AGGGTCCAATAC                        |
| TSP-C                  | SH-TCAACTGCCTGGTGATAAAACGACACTACGTGGGAATCTACTA<br>TGGCGGCTCTTC                        |
| TSP-D                  | SH-TTCAGACTTAGGAATGTGCTTCCCACGTAGTGTCGTTTGTATT<br>GGACCCTCGCAT                        |
| Click-reporter         | ACTGACTCAACTCCTC- <i>Alkyne</i>                                                       |
| FAM-DNA                | GAGGAGTTGAGTCAGT- <i>FAM</i>                                                          |
| Thiolated DNA on AuNPs | GAGGAGTTGAGTCAGTTTTTTTTTTT-SH                                                         |
| target                 | GAGGAGTTGAGTCAGTTGAGCCACTGGATAC                                                       |
| non-complementary DNA  | TCTTGTTACCTGGGGGAGTATTGCGGAGGAAGGT                                                    |
| Mismatched NA          | GAGGAGTT <b>C</b> AGTCAGTTGAGCCACTGGATAC                                              |

**SI Fig.1** images of GO in water, Cl-graphene in water, Cl-graphene in DMSO and Az-graphene in water

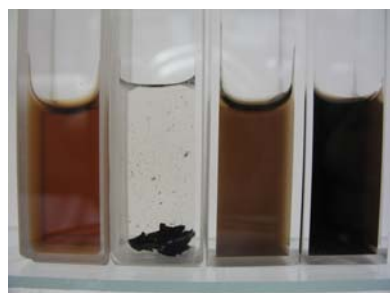

**SI Fig.2** Images of well dispersion of Az-graphene in water containing  $\text{Cu}^{2+}$  with DNA assist (left)

and the flocky precipitates of Az-graphene in water containing  $\text{Cu}^{2+}$  without DNA assist (right)

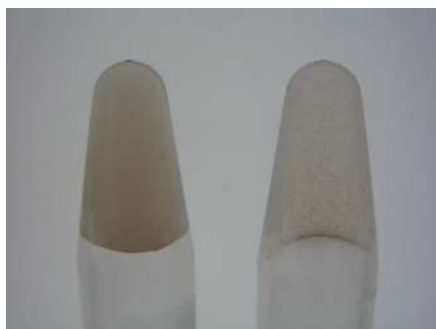

**SI Fig.3** XPS spectrum of GO

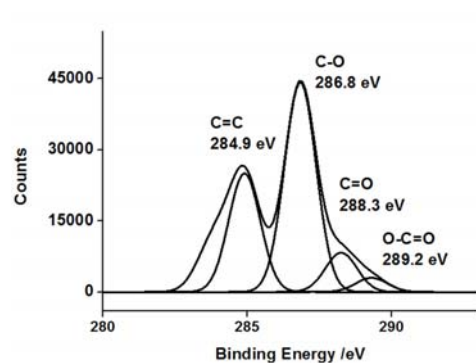

**SI Fig.4** Images of agarose gel matrices after electrophoretic separation experiments

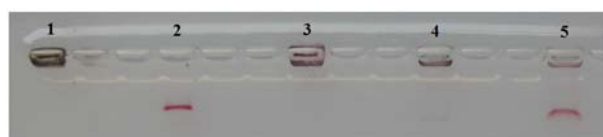

**SI Fig.5** color reaction of DNA-graphene with  $H_2O_2$  (a),  $H_2O_2$  with TMB (b), DNA-graphene with TMB (c) and DNA-graphene in the presence of TMB and  $H_2O_2$  (d)

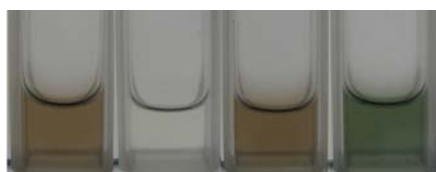

**SI Fig.6** Standard curve of FAM-DNA

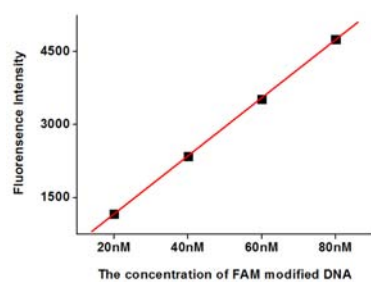

Supplement: c1nr11174d.pdf [file c1nr11174d.pdf]
